# Supplementary material for: Early Dietary Exposures Epigenetically Program Mammary Cancer Susceptibility through Igf1-Mediated Expansion of the Mammary Stem Cell Compartment
Source: MDPI journal article supplement (doi:10.3390/cells11162558), 2022-08-17
Supplement: s1 [file s1]

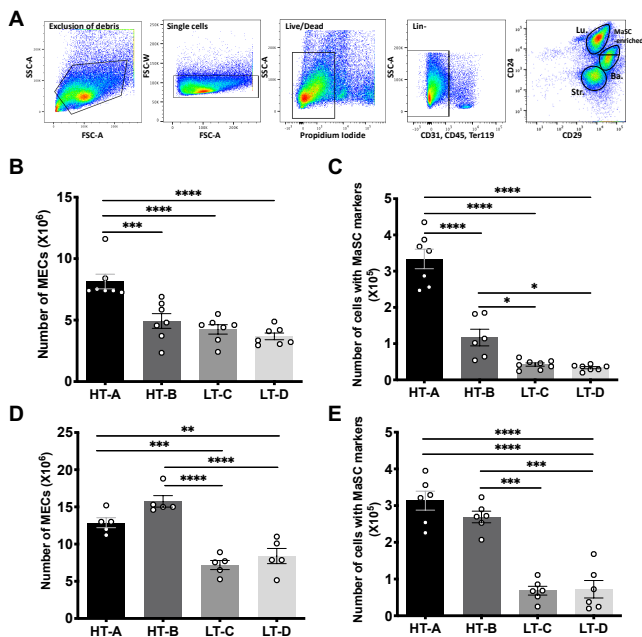

**Supplemental Figure S1. The total number of MaSCs was increased in HT compared to LT animals.** (A) Gating strategy for cell sorting. MaSC-enriched, basal (Ba.), luminal (Lu.) and stromal (Str.) cells were gated into Lin<sup>-</sup>CD24<sup>mod</sup>CD29<sup>hi</sup>, Lin<sup>-</sup>CD24<sup>+</sup>CD29<sup>hi</sup>, Lin<sup>-</sup>CD24<sup>hi</sup>CD29<sup>low</sup> and Lin<sup>-</sup>CD24<sup>low</sup>CD29<sup>low</sup> subpopulations, respectively. (B) Total numbers of rudimentary MECs harvested from abdominal/inguinal mammary glands from 5-week-old animals (n=7/group). (C) Estimates of the total number of cells with MaSC markers in 5-week-old mice (n=7/group). The frequency of the MaSC-enriched population was multiplied by the number of MECs isolated from each corresponding sample. (D) Total numbers of rudimentary MECs harvested from abdominal/inguinal mammary glands from 10-week-old animals (n=5/HT-A; n=7/HT-B; n=4/LT-C; n=4/LT-D). (E) Estimates of the total number of cells with MaSC markers in 10-week-old mice (n=5/HT-A; n=7/HT-B; n=4/LT-C; n=4/LT-D). Mean  $\pm$  SEM are shown. One-way ANOVA was used for statistical analysis, and pairwise comparisons were performed using Tukey's posttest,  $a \neq b \neq c$ ,  $P < 0.05$ .

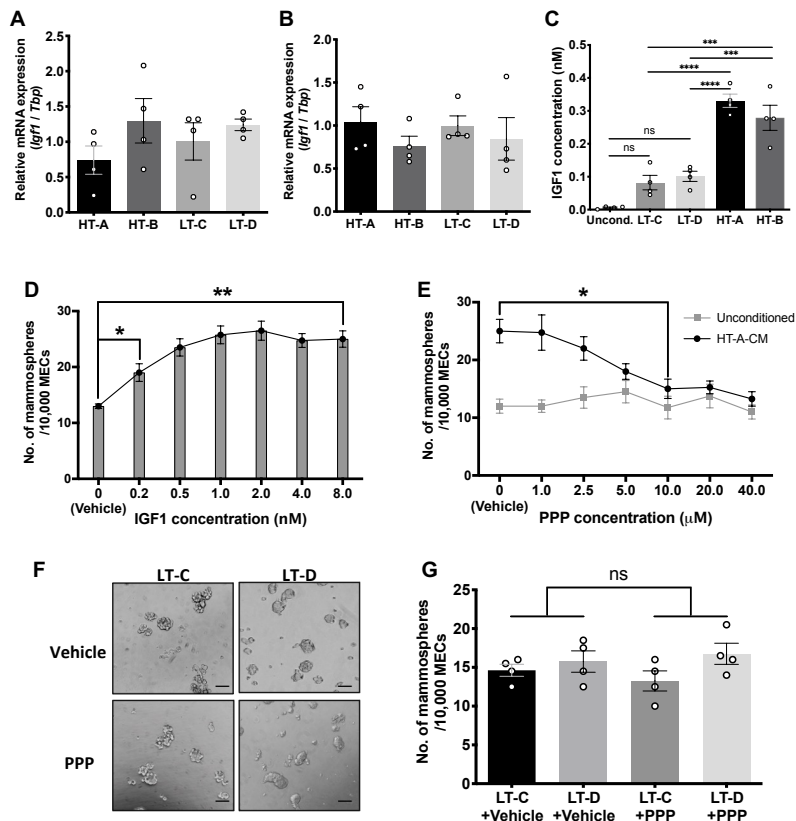

**Supplemental Figure S2.** (A) *Igf1* mRNA levels in FACS-sorted MaSC-enriched population and (B) luminal epithelial cells from mammary tissues of 5-week-old animals ( $n=4$ /group). Relative *Igf1* mRNA levels are expressed as fold change over group LT-C. (C) IGF1 protein concentrations in CM from HT and LT groups. Unconditioned DMEM/Ham's F-12 medium was used as a negative control. Four independent experiments ( $n=4$ ) were performed. (D) Dose-response analysis to determine the effect of recombinant IGF1 on mammosphere numbers in LT-C-CM. (E) Dose-response analysis to determine the effect of picropodophyllin (PPP) on mammosphere numbers in unconditioned medium or in HT-A-CM. (F) Representative images and (G) bar graph showing numbers of mammospheres formed in LT-C-CM or LT-D-CM, supplemented with DMSO vehicle or 10 μM PPP. Scale bar = 100 μm. Four independent experiments ( $n=4$ ) were performed, and data are displayed as mean  $\pm$  SEM. One-way ANOVA was used for statistical analysis and pairwise comparisons were performed using Tukey's posttest.  $a \neq b$ ,  $P < 0.05$ .

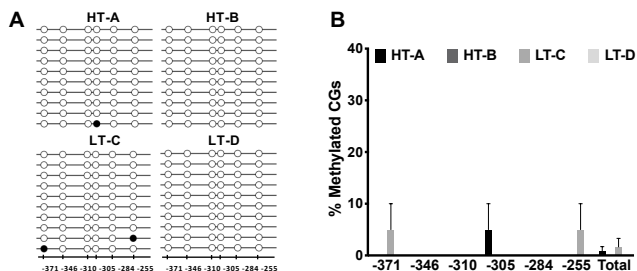

**Supplemental Figure S3. *Igf1* Pr2 was not differentially methylated in mammary stromal cells from HT and LT groups.** (A) Representative Pr2 DNA methylation patterns from each group. Each circle represents a CG site, closed circles are methylated. Each vertical line represents a single clone. (B) Quantification of DNA methylation percentages for each CG site of the Pr2 promoter. Two independent experiments (n=2/group) were performed.
