# Supplementary material for: Early Dietary Exposures Epigenetically Program Mammary Cancer Susceptibility through Igf1-Mediated Expansion of the Mammary Stem Cell Compartment
Source: Cells. 2022 Aug 17;11(16):2558. doi: 10.3390/cells11162558 (PMC9406400; doi:10.3390/cells11162558)
Supplement: Supplementary file 1 [file cells-11-02558-s001.zip › Cells-1807171 proof Supplemental tables.xlsx]

## Sheet: Table S1
Supplemental Table S1. Composition of the experimental diets
	Control, no sucrose		High fat-high sucrose
	10% of calories from fat		45% of calories from fat
Ingredients	Grams	% of calories*	Grams	% of calories*
Casein	200	0.2	200	0.2
L-Cystine	3	nd	3	nd
Cornstarch	575	0.57	0	0
Maltodextrin	125	0.12	100	0.1
Sucrose	0	0	245.6	0.24
Cellulose	50	nd	50	nd
Soybean oil	25	0.06	25	0.06
Lard	20	0.04	177.5	0.39
Minerals	45	nd	45	nd
Vitamin mix	10	nd	10	nd
Choline bitartrate	2	nd	2	nd
	4,057 kcal/1,055 g		4,057 kcal/858.1 g
*nd = not determined

## Sheet: Table S2
Supplemental Table S2. Antibodies
Antibody	Manufacturer	Catalog	RRID	Dilution	Application
anti-CD31-FITC	BP Pharmingen	558738	AB_397097	1:400	FACS
anti-CD45-FITC	BP Pharmingen	553079	AB_394609	1:400	FACS
anti-Ter119-FITC	BP Pharmingen	557915	AB_396936	1:400	FACS
anti-CD24-PacBlue	BP Pharmingen	101820	AB_572011	1:200	FACS
anti-CD29-PE-Cy7	BioLegend	102222	AB_528790	1:400	FACS
Goat polyclonal anti-IGF1	R&D Systems	AF791	AB_2248752	1:500	Western Blot
Goat polyclonal anti-IGFBP5	R&D Systems	AF578	AB_2123485	1:1000	Western Blot
Rabbit monoclonal anti-GAPDH	Cell Signaling	2118	AB_561053	1:5000	Western Blot
Rabbit polyclonal anti-DNMT3B	ThermoFisher	PA1-884	AB_2277463	1:1000	Western Blot
Goat anti-Rabbit IgG, HRP-linked	Cell Signaling	7074	AB_2099233	1:5000	Western Blot
Donkey anti-Goat IgG, HRP-linked	R&D Systems	HAF109	AB_357236	1:1000	Western Blot
Rabbit polyclonal anti-Keratin 5	BioLegend	905501	AB_2565050	1:2000	IHC
Rat monoclonal anti-Keratin 8	DSHB	TROMA-I	AB_531826	1:4	IHC

## Sheet: Table S3
Supplemental Table S3. Primers
Gene/Region	Forward (5'->3')	Reverse (5'->3')	Application
Igf1	CACATCATGTCGTCTTCACACC	GGAAGCAACACTCATCCACAATG	RT-qPCR
Igf1 Pr1	AGCAGCCTTCCAACTCAATTA	AGAGCGCCAGGTAGAAGA	RT-qPCR
Igf1 Pr2	CACTCTGACCTGCTGTGTAAA	CAGGTAGAAGAGGTGTGAAGAC	RT-qPCR
Igfbp5	CCCTGCGACGAGAAAGCTC	GCTCTTTTCGTTGAGGCAAACC	RT-qPCR
Tbp	GGAATTGTACCGCAGCTTCAAA	GATGACTGCAGCAAATCGCTT	RT-qPCR
Dnmt1	AAGAATGGTGTTGTCTACCGAC	CATCCAGGTTGCTCCCCTTG	RT-qPCR
Dnmt3a	GAGGGAACTGAGACCCCAC	CTGGAAGGTGAGTCTTGGCA	RT-qPCR
Dnmt3b	CGTTAATGGGAACTTCAGTGACC	CTGCGTGTAATTCAGAAGGCT	RT-qPCR
Igf1 Pr1	TGGGAAAGTATATTTGGAGAGATATT	TTATAATATCATTCAAATCCCTCAACT	Bisulfite PCR
Igf1 Pr2	GGTAGAAATTATTGTAAGGTATTTTTGTT	ATCACACACATACATAAACACAAA	Bisulfite PCR

## Sheet: Table S4
Supplemental Table S4. LDA statistical analysis for prepubertal mammospheres
Confidence Interval for 1/(stem cell freq.)	HT-A	HT-B	LT-C	LT-D
Lowest # of cells	262	326	533	498
Estimated # of cells	177a	254b	404c	379c
Highest # of cells	161	198	307	289
Numbers represent the lowest, estimated and highest number of cells required to form one mammosphere with a 90% probability (a≠b≠c, χ2 test , P<0.05)

## Sheet: Table S5
Supplemental Table S5. LDA statistical analysis for postpubertal mammospheres
Confidence Interval for 1/(stem cell freq.)	HT-A	HT-B	LT-C	LT-D
Lowest # of cells	188	169	351	308
Estimated # of cells	149a	135a	274b	242b
Highest # of cells	118	107	214	190
Numbers represent the lowest, estimated and highest number of cells required to form one mammosphere with a 90% probability (a≠b, χ2 test , P<0.05)

## Sheet: Table S6
Supplemental Table S6. Tumor phenotypes
Animal Group	Position	% Necrosis*	Lymphocytic Infiltration	% Squamous Differentiation	Histological type	Latency (days post dosing)	Other comments
HT-A (DR/HFHS/HFHS)	Thoracic	None	Intermediate	None	Acinar	268
HT-A	Thoracic	None	None	None	Acinar	215
HT-A	Abdominal	High, central (comedo-like pattern)	High	None	Solid	198
HT-A	Inguinal	High, central ( commedo-like pattern)	High	None	Acinar	170
HT-A	Abdominal	High, central	High	~60%	Adenosquamous	145	wide-spread keratin pearls
HT-A	Thoracic	High, central (comedo-like pattern)	High	None	Solid	173
HT-A	Thoracic	High, multi-focal	Hight	None	Solid	268
HT-A	Inguinal	High, central (comedo-like pattern)	High	~30%	Adenosquamous	156
HT-A	Abdominal/Inguinal	None	Low	~30%	Adenosquamous	105
HT-A	Abdominal/Inguinal	None	Low	~80%	Adenosquamous	69	wide-spread keratin pearls
HT-A	Cervical	Intermediate, multi-focal	High	None	Solid	180
HT-B (DR/DR/HFHS)	Thoracic	None	None	~95%	Squamous	79
HT-B	Cervical	None	None	~10%	Acinar	148	tumor with metaplastic element
HT-B	Abdominal	High, multi-focal	Low	~40%	Adenosquamous	139
HT-B	Thoracic	None	Low	~90%	Squamous	132
HT-B	Inguinal	Intermediate, multi-focal	Low	None	Acinar	226
HT-B	Thoracic	None	Low	~50%	Adenosquamous	205	wide-spread keratin pearls
HT-B	Inguinal	Intermediate, central	Low	~30%	Adenosquamous	132
HT-B	Cervical	None	None	~30%	Adenosquamous	112
HT-B	Thoracic	None	None	None	Papillary	187
HT-B	Thoracic	High, central	Intermediate	~10%	Papillary	226	minimal squamous differentition
HT-B	Thoracic	None	None	~50%	Adenosquamous	132	wide-spread keratin pearls
LT-C (HFHS/HFHS/DR)	Thoracic/Cervical	None	None	None	Acinar	259
LT-C	Thoracic	None	None	~10%	Acinar	145	tumor with metaplastic element
LT-C	Thoracic	Low	None	None	Papillary	282
LT-C	Cervical	None	None	None	Acinar	282
LT-C	Abdominal	High	Intermediate	None	Acinar	282
LT-C	Abdominal	None	None	None	Solid	282
LT-C	Thoracic	None	Low	None	Acinar	150
LT-D (HFHS/DR/DR)	Thoracic/Cervical	None	None	None	Acinar	266
LT-D	Abdominal	High	Intermediate	None	Solid	266
LT-D	Unknown	None	None	~80%	Adenosquamous	156
LT-D	Abdominal	None	None	None	Acinar	268
% Necrosis*: high(>50%), intermediate(30%~50%), minor(<30%)
